# Supplementary material
Source: MDPI journal article supplement (https://www.mdpi.com/1999-4907/8/11/440)
Supplement: s1 [file s1]

## Logging Safety & Injury Questionnaire

**Please do not write your name on this questionnaire. All responses are anonymous and confidential. The questionnaire consists of 23 questions.**

1. How long have you worked on a logging operation? \_\_\_\_\_ years
2. Currently, what is your **primary job** on the logging operation? (*Circle one*)
  - Loader operator
  - Feller-buncher operator
  - Skidder operator
  - Deck hand / topper / or other job primarily working on the ground
  - Crew foreman
  - Owner – Normally work in the woods and operate equipment
  - Owner – Occasionally operate equipment and fill in as needed
  - Other – please describe \_\_\_\_\_
3. In a typical workday, how many hours do you spend operating logging equipment? \_\_\_\_\_ hrs
4. How would you describe the relative safety of your job using a scale of 1 to 5 (*Circle one*):

| Not at all<br>dangerous |   | Moderately<br>dangerous |   | Extremely<br>dangerous |
|-------------------------|---|-------------------------|---|------------------------|
| 1                       | 2 | 3                       | 4 | 5                      |
5. What logging safety training have you received in the past? (*Circle all that apply*)
  - Safety training from crew foreman or owner (if you are an employee)
  - On the job training from co-workers
  - Safety training from insurance providers
  - Safety training at VA SHARP Logger (or NC Pro-logger) classes
  - Equipment specific safety training from equipment sales or manufacturer representative
  - Other safety training (please describe) \_\_\_\_\_
6. How would you describe your attitude towards using **PPE (Personal Protective Equipment)**, for example hard hats, hearing protection, chainsaw chaps if using a saw, high visibility clothing etc.

| Using PPE is not<br>at all important |   | Moderately<br>important |   | Using PPE is<br>very important |
|--------------------------------------|---|-------------------------|---|--------------------------------|
| 1                                    | 2 | 3                       | 4 | 5                              |
7. What do you see as the biggest safety risk on your operation?

8. If you are a machine operator what do you see as the biggest safety risk for workers on the ground?
9. Have you experienced an episode of wheezing or whistling in your chest?  
☐ No ☐ Yes
10. Which of the following have you experienced while operating a machine or working near a machine? (Circle all that apply)
- Irritation of the eyes
  - Irritation of the nose
  - Unpleasant smell

**We are interested in learning more about your injury and illness experiences while performing work as a logger. For our purposes, an injury is defined as having a known time of onset, rather than symptoms or disorders that gradually worsened over time.**

11. Have you ever experienced an injury while working on a logging operation?  
☐ No ☐ Yes
12. **In the past year** how many times were you injured on the job severe enough that it caused you to modify your work activities for the rest of the day or take medication? *(Circle one)*
- 0, I have not injured myself (SKIP TO QUESTION 20)
  - 1
  - 2
  - More than 2 times

**Please answer the following question about your injury experience in the past year. If you had more than one injury, please answer these questions based on the injury you personally felt to be the most severe.**

13. What were you doing when you were injured? (e.g., climbing onto a piece of equipment)
14. How did the injury happen? (e.g., I slipped and fell)

15. What best describes the body part injured? (*Circle all that apply*)

- Head
- Neck, Including Throat
- Trunk (chest, back, abdomen, hip)
- Upper Extremities (shoulder, arm, wrist, hand)
- Lower Extremities (thigh, leg, ankle, foot)
- Body Systems (for example: gastrointestinal system, nervous system, respiratory system)
- Other Body Parts (please describe) \_\_\_\_\_

16. Was an object (e.g., tool, machine) involved in the injury/illness?

☐ No

☐ Yes

If Yes, what object \_\_\_\_\_

17. Did you miss any days of work as a result of injury?

☐ No

☐ Yes

If Yes, how many days \_\_\_\_\_

18. Did you receive medical care for this injury beyond first aid?

☐ No

☐ Yes

19. Was the injury reported as a workers' compensation claim?

☐ No

☐ Yes

☐ Not Sure

**This section relates to your experiences in the past year with symptoms such as pain, stiffness, spasm, aching, burning, tingling, or numbness. We are interested in ANY symptoms, not just those you had at work or symptoms you think are related to work.**

20. Please answer by marking an “X” in the appropriate box – one “X” for each body region. Please answer every question, even if you have never had trouble (ache, pain, discomfort) in any part of your body.

**Have you experienced such symptoms in your:**

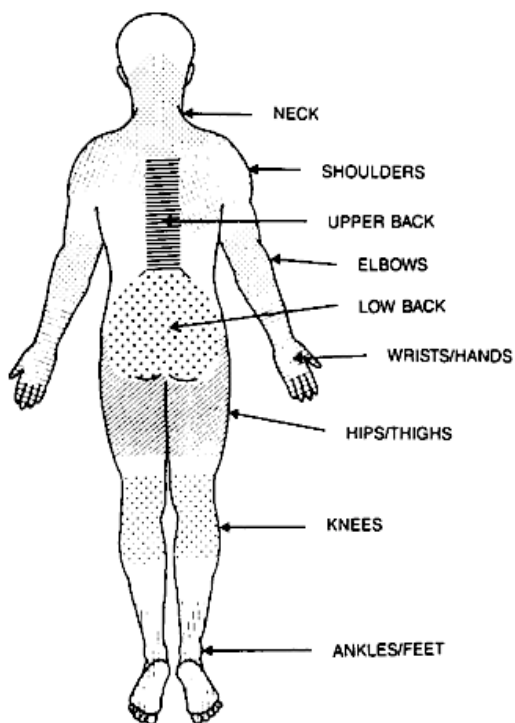

|                                                                                                                                                                                               |
|-----------------------------------------------------------------------------------------------------------------------------------------------------------------------------------------------|
| <b>Neck</b><br><input type="checkbox"/> No <input type="checkbox"/> Yes                                                                                                                       |
| <b>Shoulders</b><br><input type="checkbox"/> No <input type="checkbox"/> Yes, in the right only<br><input type="checkbox"/> Yes, in the left only<br><input type="checkbox"/> Yes, in both    |
| <b>Elbows</b><br><input type="checkbox"/> No <input type="checkbox"/> Yes, in the right only<br><input type="checkbox"/> Yes, in the left only<br><input type="checkbox"/> Yes, in both       |
| <b>Wrists/hands</b><br><input type="checkbox"/> No <input type="checkbox"/> Yes, in the right only<br><input type="checkbox"/> Yes, in the left only<br><input type="checkbox"/> Yes, in both |
| <b>Upper back</b><br><input type="checkbox"/> No <input type="checkbox"/> Yes                                                                                                                 |
| <b>Low back</b><br><input type="checkbox"/> No <input type="checkbox"/> Yes                                                                                                                   |
| <b>One or both hips/thighs</b><br><input type="checkbox"/> No <input type="checkbox"/> Yes                                                                                                    |
| <b>One or both knees</b><br><input type="checkbox"/> No <input type="checkbox"/> Yes                                                                                                          |
| <b>One or both ankles/feet</b><br><input type="checkbox"/> No <input type="checkbox"/> Yes                                                                                                    |

21. If you answered “No” to all questions above, SKIP TO QUESTION 22.

If you answered “Yes” to any of questions above, during the past year,

- a. Have you had to alter the way you do your work as a result of musculoskeletal symptoms?  
☐ No                      ☐ Yes
- b. Have you missed work as a result of your musculoskeletal symptoms?  
☐ No                      ☐ Yes
- c. Did you think about changing jobs because of your musculoskeletal symptoms?  
☐ No                      ☐ Yes

**This section seeks your general comments and recommendations on safety.**

22. What recommendations do you have to improve safety on your job site, or on logging operations in general?

23. As we continue to improve our understanding of the safety and health of workers in the logging industry, is there anything else you think we should know?

**Thank you for taking the time to complete this questionnaire. Your answers will provide valuable information that may help to improve logging safety.**
